# Supplementary material for: Closing the carbon cycle: challenges and opportunities of CO2 electrolyser designs in light of cross-industrial CO2 source-sink matching in the European landscape
Source: Royal Society of Chemistry journal article supplement (doi:10.1039/d4ee06204c), 2025-01-01
Supplement: d4ee06204c1.pdf [file d4ee06204c1.pdf]

## Supporting Information

# Closing the Carbon Cycle: Challenges and Opportunities of CO<sub>2</sub> Electrolyser Designs in Light of Cross-Industrial CO<sub>2</sub> Source-Sink Matching in the European Landscape

Muhammad Tayyab<sup>†,b</sup>, Maximiliane Dreis<sup>†,a</sup>, Dennis Blaudszun<sup>†,a</sup>, Kevinjeorjios Pellumbi<sup>†,a</sup>, Urbain Nzotcha<sup>†,b</sup>, Hermann Tempel<sup>†,b</sup>, Muhammad Qaiser Masood<sup>a</sup>, Henning Weinrich<sup>b</sup>, Kai junge Puring<sup>a</sup>, Sebastian Stießel<sup>a</sup>, Rüdiger-A. Eichel<sup>b,c,d,\*</sup>, and Ulf-Peter Apfel<sup>a,e,\*</sup>

a. Fraunhofer Institute for Environmental, Safety and Energy Technology UMSICHT, Oberhausen, Germany

b. Forschungszentrum Jülich, Institute of Energy Technologies, Fundamental Electrochemistry (IET-1), Jülich, Germany

c. RWTH Aachen University, Institute of Physical Chemistry, Aachen, Germany

d. RWTH Aachen University, Faculty of Mechanical Engineering, Aachen, Germany

e. Ruhr University Bochum, Inorganic Chemistry I, Bochum, Germany

† These Authors contributed equally to the work.

\* Corresponding authors:

## Table of Contents

|       |                                                                             |    |
|-------|-----------------------------------------------------------------------------|----|
| I.    | Search Term strategy.....                                                   | 3  |
| II.   | References Analysis .....                                                   | 4  |
| III.  | Source and CO <sub>2</sub> emissions analysis .....                         | 5  |
| IV.   | High Temperature CO <sub>2</sub> Electrolysis to CO .....                   | 8  |
| V.    | Low Temperature CO <sub>2</sub> Electrolysis to CO .....                    | 8  |
| VI.   | CO <sub>2</sub> Electrolysis to Formic Acid / Formate.....                  | 9  |
| VII.  | CO <sub>2</sub> Electrolysis to Ethylene & Alcohols .....                   | 10 |
| VIII. | CO <sub>2</sub> to CO technologies (Supplementary Note 1) .....             | 10 |
| IX.   | Methodology for the carbon source-sink matching (Supplementary Note 2)..... | 12 |
| A.    | General remarks.....                                                        | 12 |
| B.    | Unavoidable CO <sub>2</sub> sources and sinks in Europe.....                | 13 |
| C.    | CO <sub>2</sub> source/sink matching-Chemical demand.....                   | 14 |
| X.    | References .....                                                            | 15 |

# I. Search Term strategy

**Table S1** Search terms used for the employed SciFinder investigation in this work.

| Level        | 1                                 | 2                             | 3                                                |
|--------------|-----------------------------------|-------------------------------|--------------------------------------------------|
| Terms        | Scope                             | Process                       | Products                                         |
| Alternatives | CO <sub>2</sub><br>Carbon Dioxide |                               | Formate<br>formic acid<br>HCOO*                  |
|              |                                   |                               | CO<br>Carbon monoxide<br>Syngas<br>Synthesis gas |
|              |                                   | Electroreduction              |                                                  |
|              |                                   | Electrochemical<br>reduction  | Ethanol<br>C <sub>2</sub> H <sub>5</sub> OH      |
|              |                                   | Electrolysis                  | Ethylene<br>C <sub>2</sub> H <sub>4</sub>        |
|              |                                   | Electrocatalytic<br>reduction | Methane<br>CH <sub>4</sub>                       |
|              |                                   | Power to X                    |                                                  |
|              |                                   | P2X                           | Ethane<br>C <sub>2</sub> H <sub>6</sub>          |
|              |                                   | Electrocatalysis              |                                                  |
|              |                                   | Electrochemical conversion    | Formaldehyde<br>CH <sub>2</sub> O                |
|              |                                   |                               | Methanal<br>CH <sub>2</sub> O                    |
|              |                                   |                               | Methanol<br>CH <sub>3</sub> OH                   |

## II. References Analysis

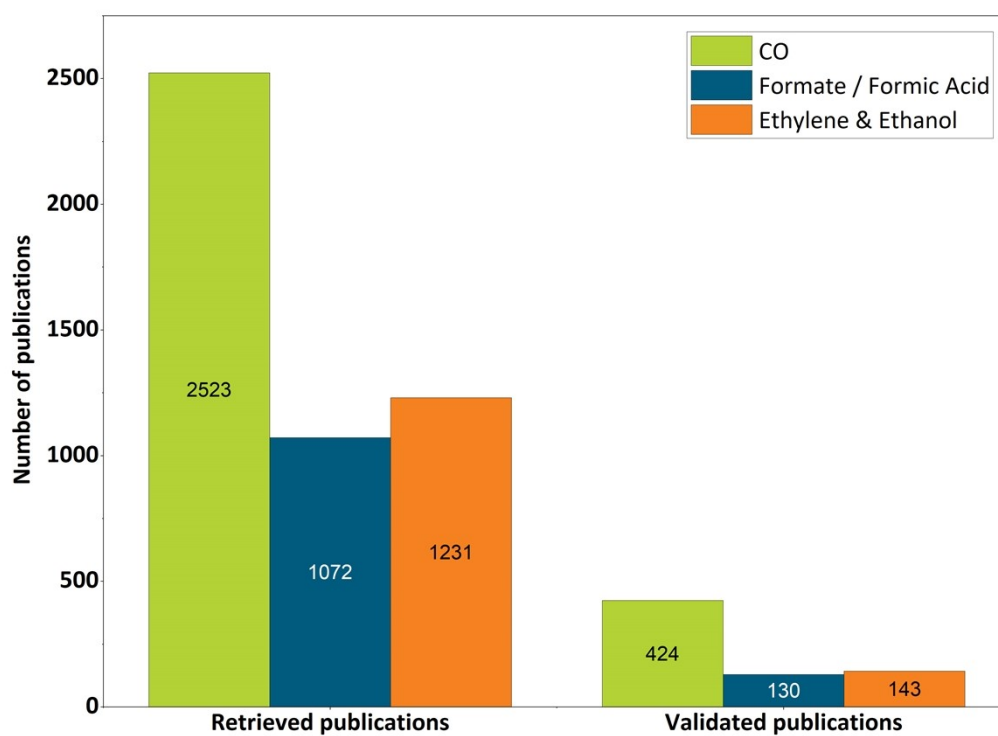

Fig. S1 : Comparison between the numbers of retrieved publications through the search term analysis and the final number of publications containing all the targeted KPIs

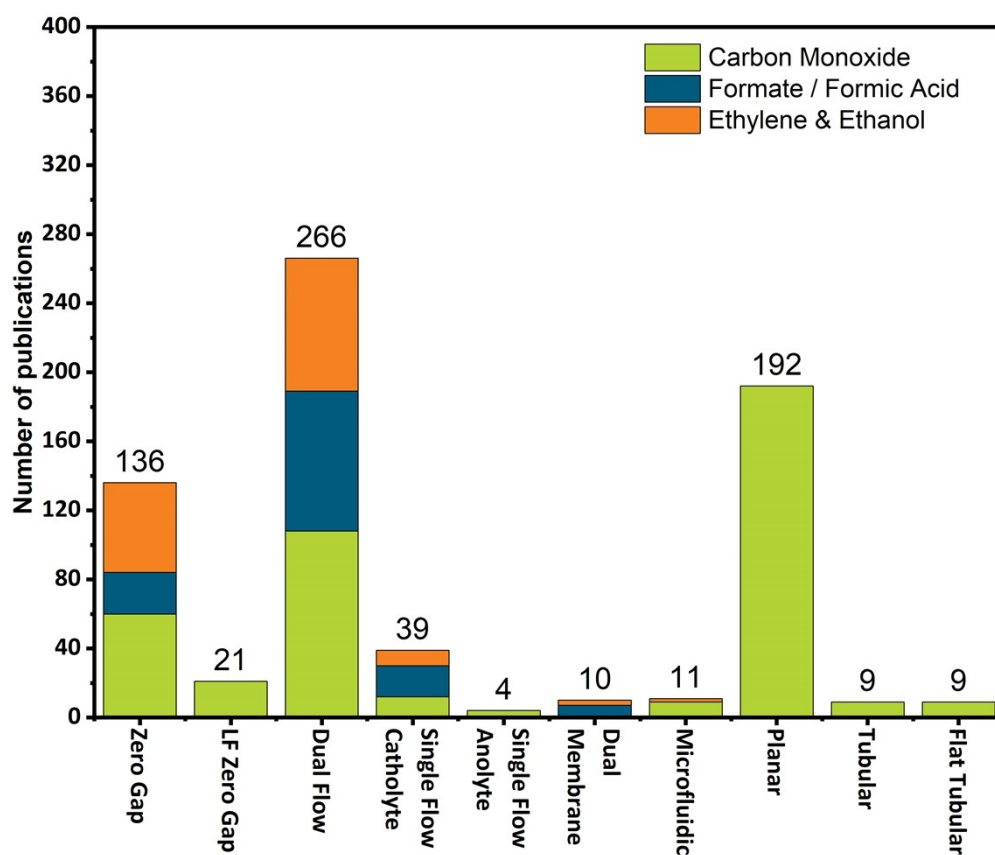

Fig. S2 Segmented analysis of the number of publications featuring an investigated reactor type (both for the low and high temperature CO<sub>2</sub> electrolysis) for the different CO<sub>2</sub>R products

### III. Source and CO<sub>2</sub> emissions analysis

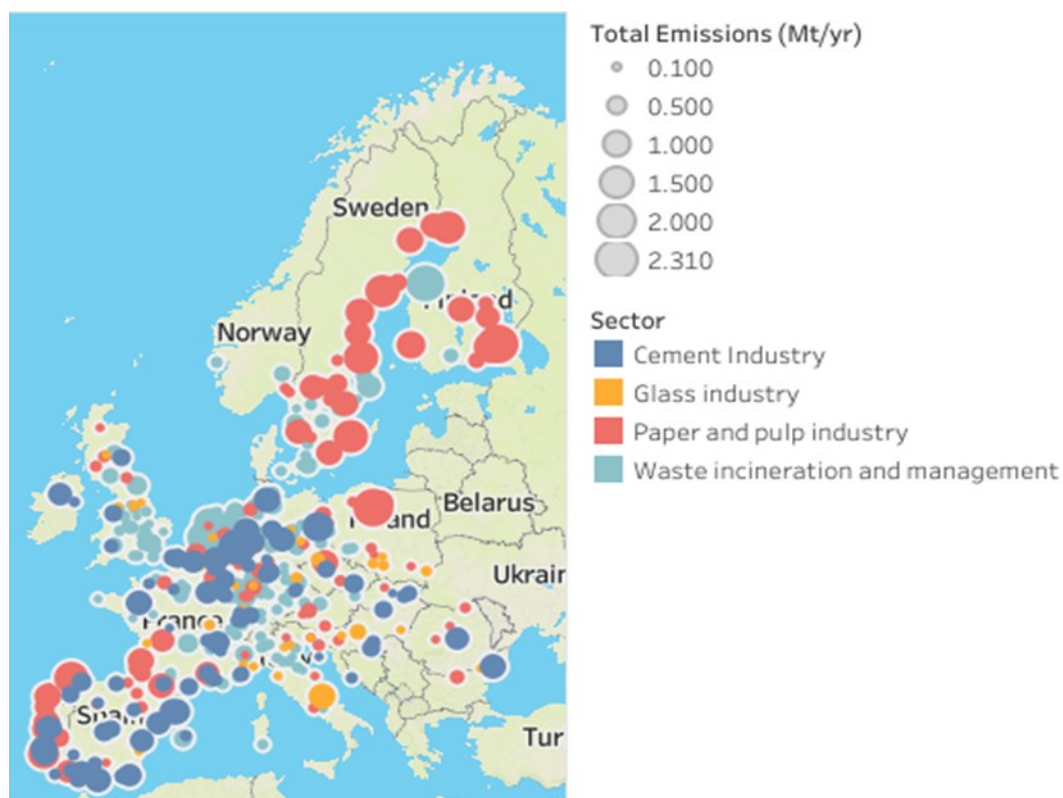

**Fig. S3** Source and CO<sub>2</sub> emission analysis in Europe from the four different industries that were analysed in this work. Data from: European Pollutant Release and Transfer Register (EPRTR) – Dataset 2017 Data from: European Pollutant Release and Transfer Register (EPRTR) – Dataset 2017

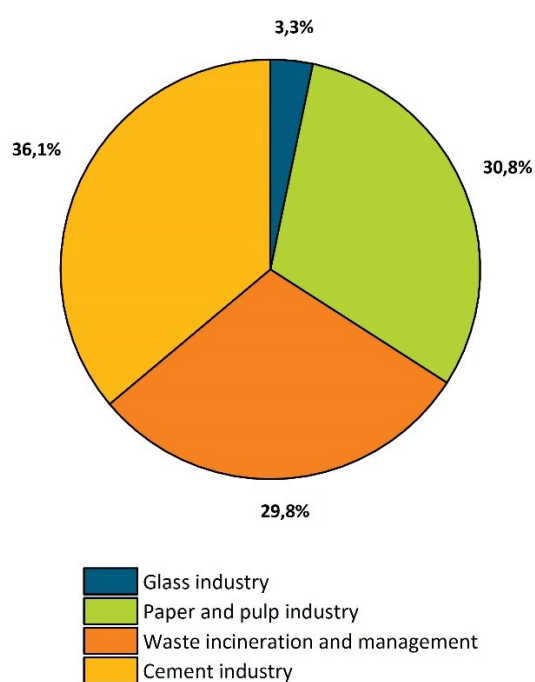

**Fig. S4** Distribution of unavoidable CO<sub>2</sub> emissions of the four industrial sectors investigated in this work

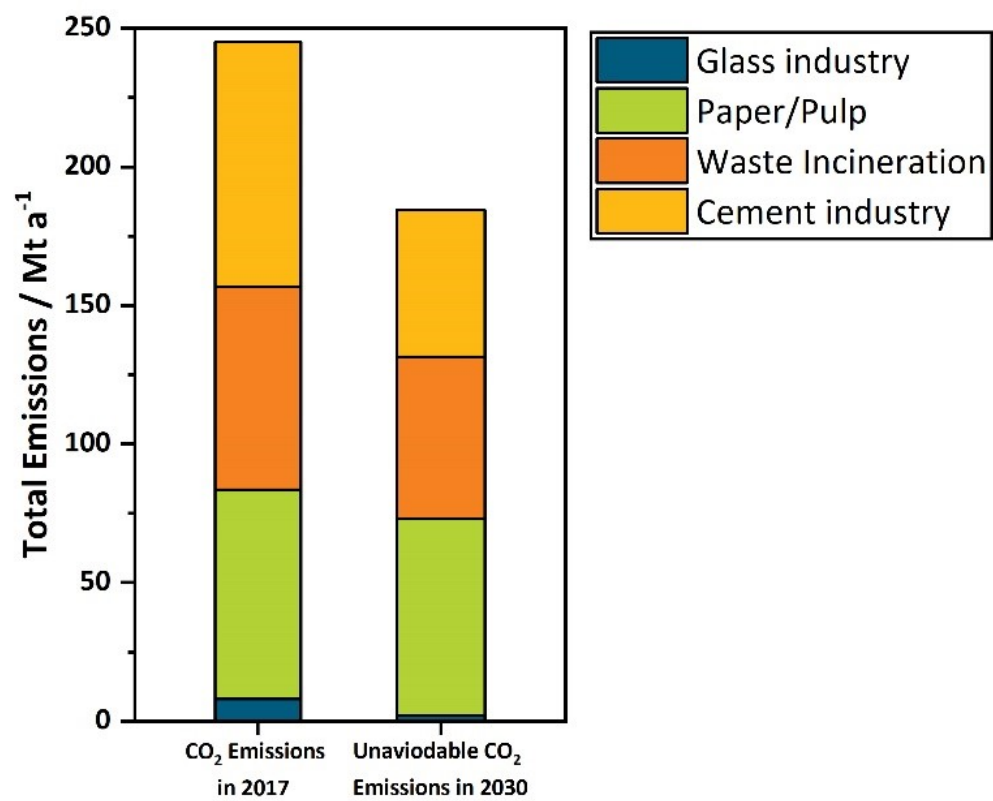

Fig. S5 Distribution of CO<sub>2</sub> emissions in 2017 and 2030 per industrial sector

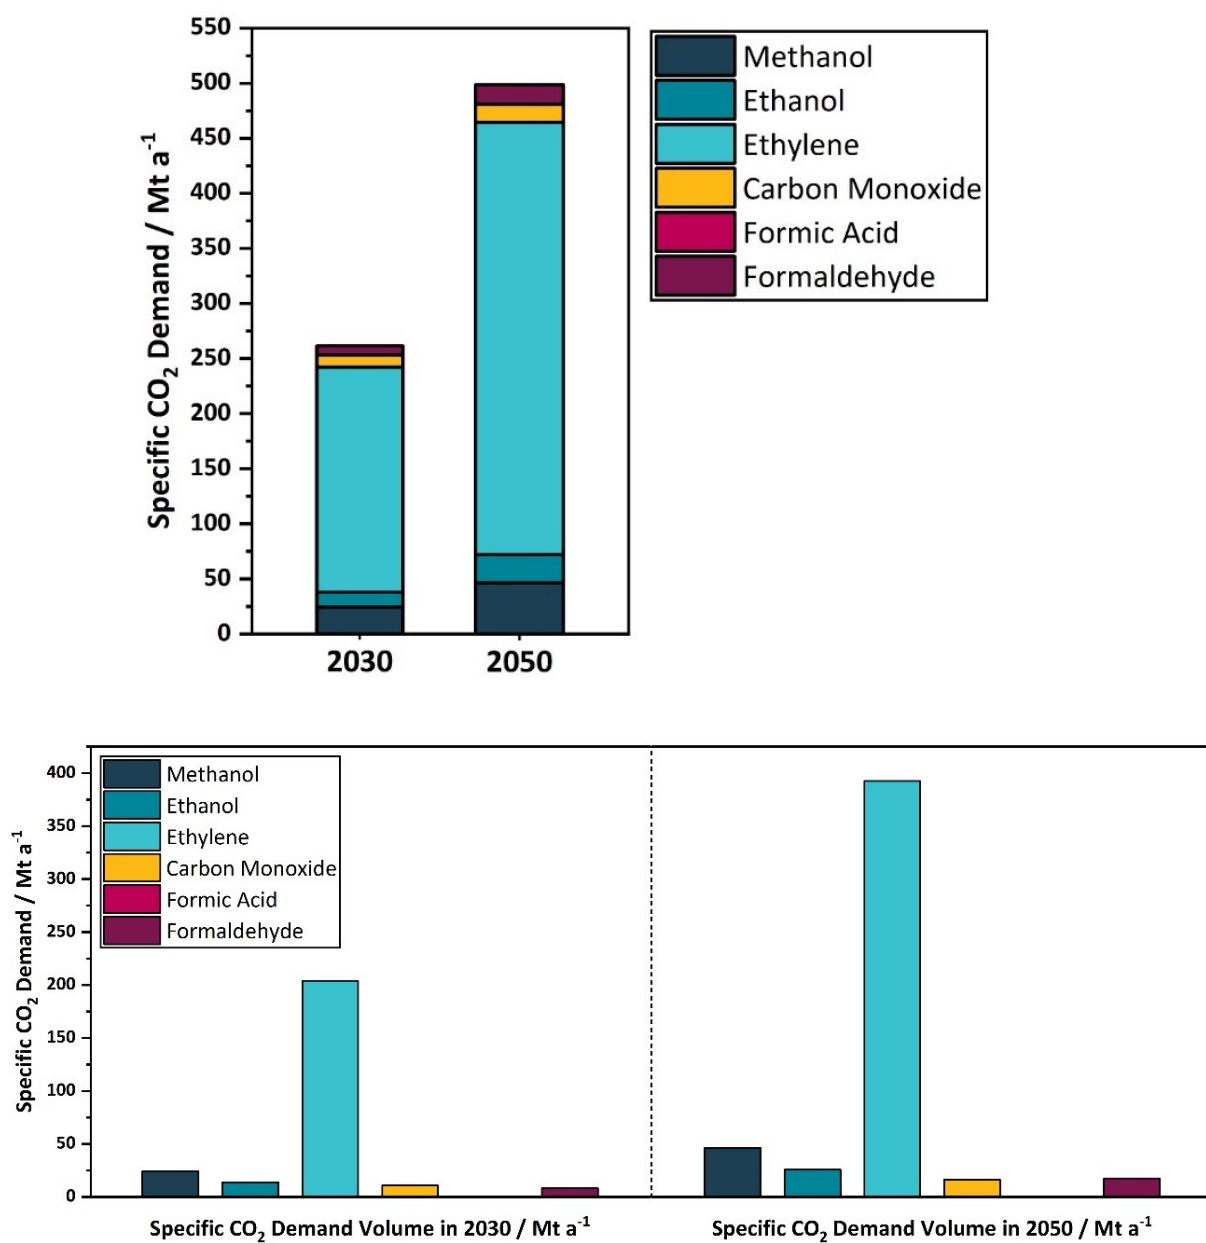

Fig. S6 Cumulative and specified CO<sub>2</sub> demand for different carbon products in 2030 and 2050.

## IV. High Temperature CO<sub>2</sub> Electrolysis to CO

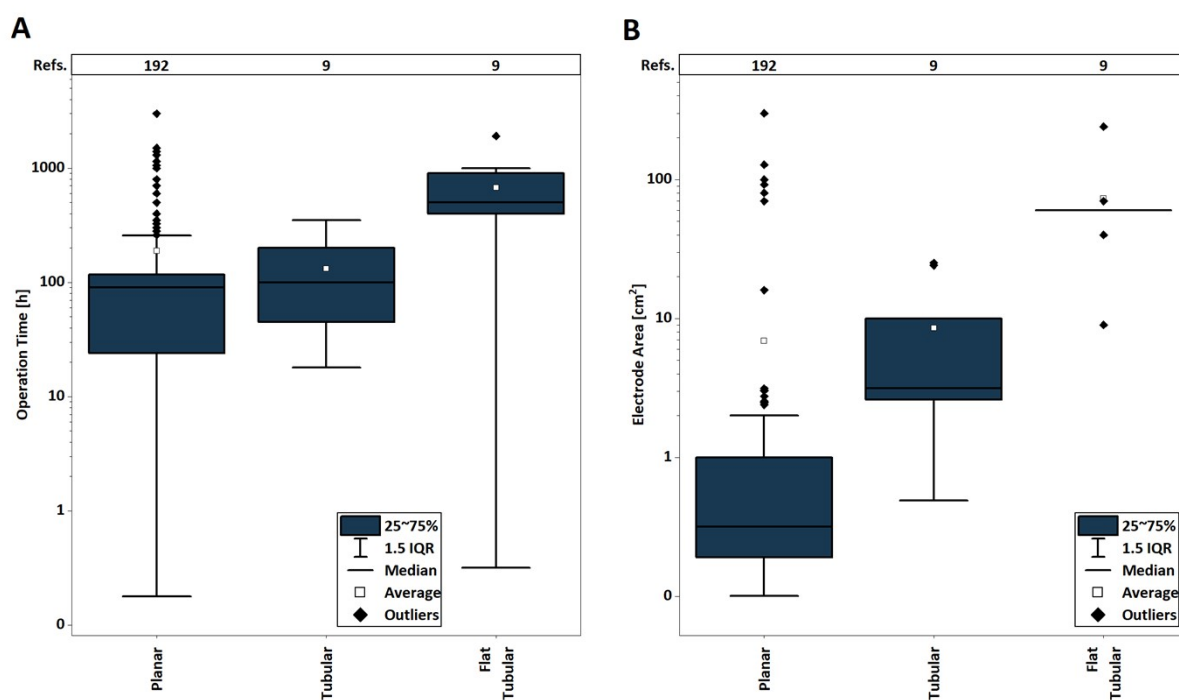

**Fig. S7** Electrolysis experiment durations (A) and electrode active area (B) of high temperature CO<sub>2</sub> electrolysis to CO through various reactor technologies, reported by 210 references.

## V. Low Temperature CO<sub>2</sub> Electrolysis to CO

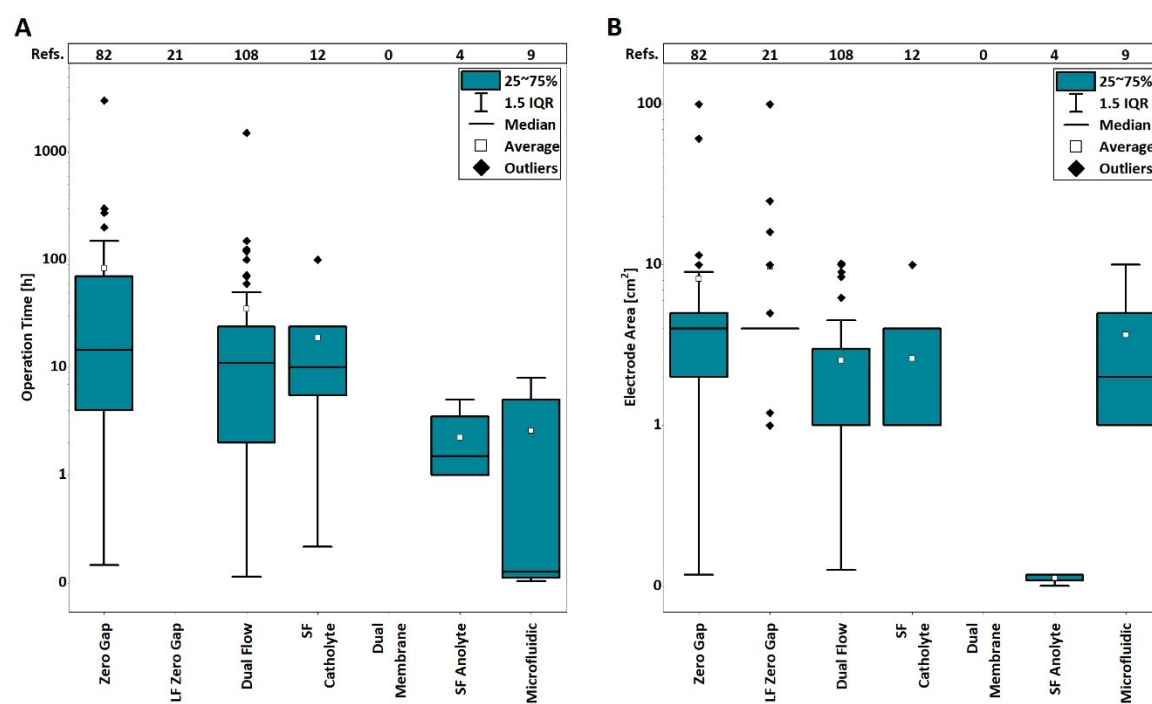

**Fig. S8** Electrolysis experiment durations (A) and electrode active area (B) of low temperature CO<sub>2</sub> electrolysis to CO through various reactor technologies, reported by 249 references.



## VI. CO<sub>2</sub> Electrolysis to Formic Acid / Formate

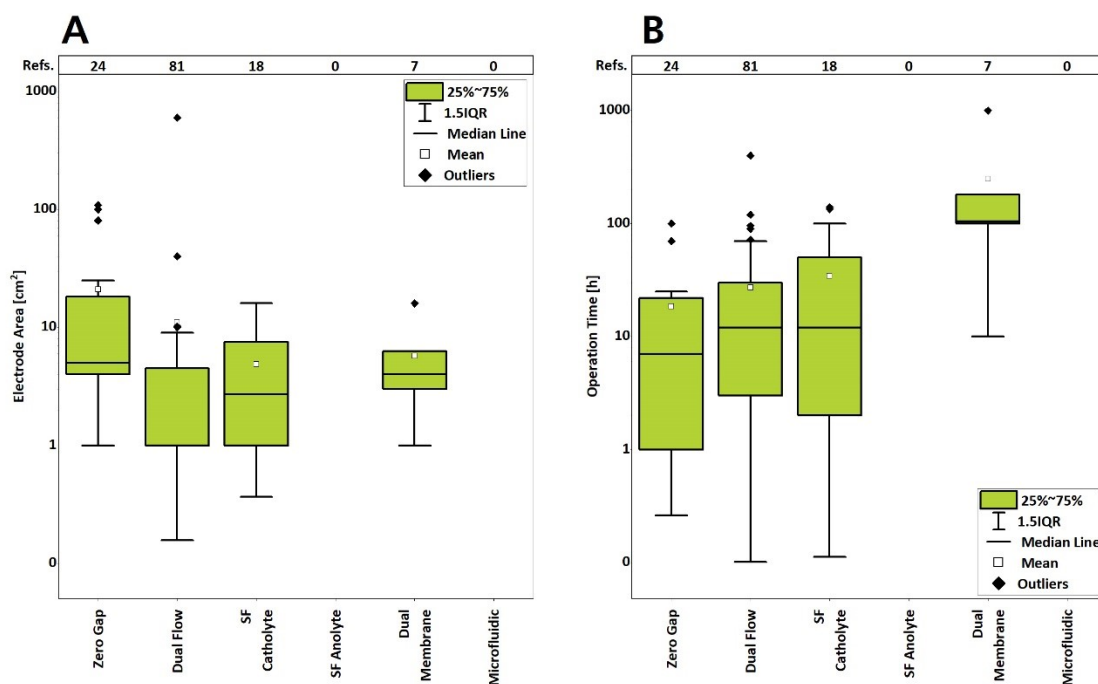

**Fig. S9** Electrolysis experiment durations (A) and electrode active area (B) of low temperature CO<sub>2</sub> electrolysis to formate/formic acid through various reactor technologies, reported by 130 references.

# VII. CO<sub>2</sub> Electrolysis to Ethylene & Alcohols

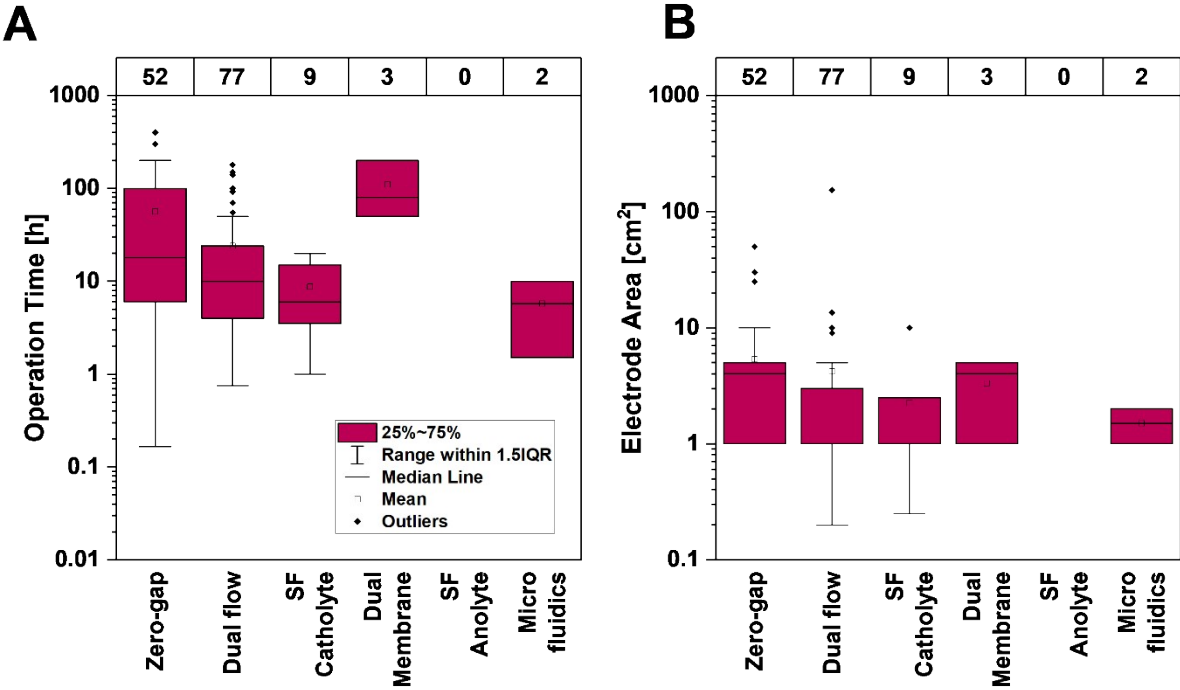

**Fig. S10** Statistics of experiment durations (A) and electrode active areas (B) of low temperature electrolysis of CO<sub>2</sub> to ethylene and ethanol using different reactor technologies, reported by 143 references.

# VIII. CO<sub>2</sub> to CO technologies (Supplementary Note 1)

**Table S2** Summarizing table of the strong and weak point of each technology (HT and LT) for the conversion of CO<sub>2</sub>

| Aspect                | High-Temperature (HT) CO <sub>2</sub> Electrolyzers                                                                                                                                                                    | Low-Temperature (LT) CO <sub>2</sub> Electrolyzers                                                                                                                                                                                            |
|-----------------------|------------------------------------------------------------------------------------------------------------------------------------------------------------------------------------------------------------------------|-----------------------------------------------------------------------------------------------------------------------------------------------------------------------------------------------------------------------------------------------|
| Operating Temperature | 500–1000°C                                                                                                                                                                                                             | Room temperature to ~80°C                                                                                                                                                                                                                     |
| Performance           | <ul style="list-style-type: none"><li>- High reaction kinetics and faster CO<sub>2</sub> conversion rates.</li><li>- High efficiency for CO and syngas production.</li></ul>                                           | <ul style="list-style-type: none"><li>- High selectivity for liquid products like alcohols.</li><li>- Moderate reaction rates.</li></ul>                                                                                                      |
| Materials             | <ul style="list-style-type: none"><li>- Requires ceramic-based materials (e.g., solid oxide cells) that can withstand high temperatures.</li><li>- Material degradation due to thermal cycling is a concern.</li></ul> | <ul style="list-style-type: none"><li>- Use of polymer or aqueous electrolytes.</li><li>- Corrosion-resistant metals and cost-effective catalysts can be employed.</li></ul>                                                                  |
| Catalyst Requirements | <ul style="list-style-type: none"><li>- Ni-based catalysts for CO<sub>2</sub> splitting are robust but require high stability under thermal stress.</li></ul>                                                          | <ul style="list-style-type: none"><li>- Ag,Cu-based and molecular catalysts for gaseous and liquid products.</li><li>- Catalyst poisoning (e.g., by impurities, oxygen) can be an issue.</li><li>- Ir is currently necessary in the</li></ul> |

|                                        |                                                                                                                                                                                                   |                                                                                                                                                                                         |
|----------------------------------------|---------------------------------------------------------------------------------------------------------------------------------------------------------------------------------------------------|-----------------------------------------------------------------------------------------------------------------------------------------------------------------------------------------|
|                                        |                                                                                                                                                                                                   | anode.                                                                                                                                                                                  |
| Energy Efficiency                      | <ul style="list-style-type: none"> <li>- High thermodynamic efficiency due to thermal energy integration with electrical energy.</li> <li>- Less overpotential required for reactions.</li> </ul> | <ul style="list-style-type: none"> <li>- Lower energy efficiency due to higher overpotentials and ohmic losses.</li> <li>- Energy cost increases with product concentration.</li> </ul> |
| Product Spectrum                       | <ul style="list-style-type: none"> <li>- Primarily CO and syngas (CO+H<sub>2</sub>), which are precursors for fuels and chemicals.</li> </ul>                                                     | <ul style="list-style-type: none"> <li>- Flexible product range including CO, hydrocarbons and alcohols.</li> <li>- High selectivity possible for specific products.</li> </ul>         |
| Durability                             | <ul style="list-style-type: none"> <li>- Ceramic components are stable over long-term operation, but sensitive to thermal cycling and redox cycling.</li> </ul>                                   | <ul style="list-style-type: none"> <li>- Membrane durability is moderate but can degrade over time, especially in highly acidic or alkaline conditions.</li> </ul>                      |
| Scalability                            | <ul style="list-style-type: none"> <li>- Limited by high-temperature reactor designs and thermal management requirements.</li> <li>- Suitable for centralized, large-scale facilities.</li> </ul> | <ul style="list-style-type: none"> <li>- Highly scalable for distributed and modular systems.</li> <li>- Easier to integrate with renewable energy sources.</li> </ul>                  |
| Startup/Shutdown                       | <ul style="list-style-type: none"> <li>- Long startup and cooldown times. - Not suitable for intermittent operation.</li> </ul>                                                                   | <ul style="list-style-type: none"> <li>- Rapid startup and shutdown.</li> <li>- Well-suited for intermittent operation with renewables.</li> </ul>                                      |
| CO <sub>2</sub> Utilization Efficiency | <ul style="list-style-type: none"> <li>- High conversion rates, but product diversity limited to CO and Syngas</li> </ul>                                                                         | <ul style="list-style-type: none"> <li>- Moderate conversion rates with potential for diverse and value-added products.</li> </ul>                                                      |
| Cost                                   | <ul style="list-style-type: none"> <li>- High capital cost due to materials, reactor design, and thermal energy requirements.</li> <li>- Maintenance costs related to thermal stress.</li> </ul>  | <ul style="list-style-type: none"> <li>- Lower capital cost compared to SOEC.</li> <li>- Necessary time to exchange stacks currently unclear.</li> </ul>                                |
| Industrial Applications                | <ul style="list-style-type: none"> <li>- Well-suited for CO<sub>2</sub> conversion in industrial syngas applications (e.g., Fischer-Tropsch synthesis).</li> </ul>                                | <ul style="list-style-type: none"> <li>- More ideal for producing alcohols and other organics for decentralized applications.</li> </ul>                                                |
| Challenges                             | <ul style="list-style-type: none"> <li>- Thermal management and material durability under extreme conditions.</li> <li>- Integration with renewable energy sources is complex.</li> </ul>         | <ul style="list-style-type: none"> <li>- Catalyst development for high selectivity and durability.</li> <li>- Mitigating mass transport limitations in zero-gap designs.</li> </ul>     |

## IX. Methodology for the carbon source-sink matching (Supplementary Note 2)

### A. General remarks

#### Unavoidable CO<sub>2</sub> Emissions

- CO<sub>2</sub> emitters have been selected based on processes, which cannot be eliminated due to an inherent CO<sub>2</sub> emission from the process chemistry (Cement, Glass) or lack of alternative technologies (Paper/Pulp, Waste incineration)
- Two scenarios are deduced from data:
  1. **Business as usual based on the current market size / emission data and expected market growth rates**
  2. **Progressive Scenario, where the CO<sub>2</sub> emissions per unit produced is reduced over time based on individual factors; market growth rates are similar**
- The CO<sub>2</sub> emissions in the manuscript are given with a capture (87 %) and utilization factor (70 %) as presented in [1]<sup>1</sup>; **Data in the following tables are quoting the total CO<sub>2</sub> emissions excluding the capture and utilization factor**

#### CO<sub>2</sub> R Product Demand

- Product scope based on technical analysis
- Data for the products based on market reports with the scope Europe (only ethylene is scoped to EU due to data availability)
- The growth is according to market studies with a typical scope of ~ 5-10 yrs and extrapolated to 2050
- Two scenarios are deduced:
  1. **Data extrapolated as is → higher boundary**
  2. **Compensation of certain product value chains, which interfere with each other (i.e., MtO synthesis of ethylene) → Lower boundary**
- CO<sub>2</sub> Demands are calculated from the specific kg CO<sub>2</sub> need per kg of product and the product demand from market studies

## B. Unavoidable CO<sub>2</sub> sources and sinks in Europe

### Cement industry

- Cement production in 2021 from a market study for Europe and is extrapolated with a CAGR of 1.9% [2]
- CO<sub>2</sub> emissions are estimated based on an IEA study ( $0.6 \text{ t}_{\text{CO}_2} / \text{t}_{\text{Cement}}$ ) [3]
- Progressive scenario is based on a linear weighting factor for the prior “business as usual” and an ideal case assuming complete reduction any non-raw material (limestone) connected from cement production (60 % from current CO<sub>2</sub> emissions are from raw materials) [4]

### Glass Industry

- Base case for CO<sub>2</sub> emissions is from 2017 based on Europe [5]
- Growth rate based on European flat glass market study (CAGR: 3.0%) [6]
- Progressive scenario is based on a linear weighting factor for the prior “business as usual” and an ideal case assuming a total reduction of 75 % (25% remaining) from today’s CO<sub>2</sub> emissions [7]

### Paper/Pulp Industry

- Base case for CO<sub>2</sub> emissions is from 2017 based on Europe [8]
- Growth rate based on market history from CEPI (European Paper/Pulp Association) (CAGR: 0.8%) [9]
- Progressive scenario is based on a linear weighting factor for the prior “business as usual” and an ideal case assuming a total reduction of 63 % (37 % remaining) from today’s CO<sub>2</sub> emissions [10]

### Waste Incineration

- CO<sub>2</sub> emissions based on waste/capital [10], UN population development prediction [11] for Europe and the balance of Energy and CO<sub>2</sub> emissions per ton of waste [1]
- “Business as usual” scenario assumes a recycling factor of 48 %; an ideal 73% [12]
- Progressive scenario is based on a linear weighting factor for the prior “business as usual” and the ideal case

### C. CO<sub>2</sub> source/sink matching-Chemical demand

| Carbon monoxide                                                                                                                                                                                                                                                                                                                                                                                                                                                                      |
|--------------------------------------------------------------------------------------------------------------------------------------------------------------------------------------------------------------------------------------------------------------------------------------------------------------------------------------------------------------------------------------------------------------------------------------------------------------------------------------|
| <ul style="list-style-type: none"><li>➤ Global market volume for in USD for 2022 and projected market growth of 4.4 % CAGR [13]</li><li>➤ Conversion into global CO tonnage demand with the market price of CO [14] (CO price (adj. by 1.5 % inflation/year) and Europe market share)</li><li>➤ Market share of Europe based on the market share of European chemical industry on the global market (20 %)</li></ul>                                                                 |
| Formic Acid                                                                                                                                                                                                                                                                                                                                                                                                                                                                          |
| <ul style="list-style-type: none"><li>➤ Global formic acid demand is known for 2021 from [15] along with the CAGR (4.45 %) for market development based on a forecast until 2035</li><li>➤ The European share of the formic acid market is reported to be 21% of the global market. [16]</li></ul>                                                                                                                                                                                   |
| Ethylene                                                                                                                                                                                                                                                                                                                                                                                                                                                                             |
| <ul style="list-style-type: none"><li>➤ European Ethylene market demand and projected growth rates are relatively precisely projected until 2030 [17]</li><li>➤ For further projection, the CAGR was averaged for the data from 2023-2030 → -1.38 %</li><li>➤ Projection to 2050 based on the average CAGR</li></ul>                                                                                                                                                                 |
| Methanol                                                                                                                                                                                                                                                                                                                                                                                                                                                                             |
| <ul style="list-style-type: none"><li>➤ European market development in Mt/a is projected until 2030 [18]</li><li>➤ Methanol market includes the production of ethylene and formaldehyde based on [19]. 10.16-12.92 % of global methanol is used for ethylene production via MtO (28.79 %) and 24.01 % is used for formaldehyde production.</li><li>➤ The ratio for Ethylene from MtO was derived from [20] these were subtracted from the total market demand for Methanol</li></ul> |
| Ethanol                                                                                                                                                                                                                                                                                                                                                                                                                                                                              |
| <ul style="list-style-type: none"><li>➤ EU Ethanol market demand and projected growth rates are relatively precisely projected until 2030 [21]</li><li>➤ CAGR data on Europe level was not available, but total market size &amp; market prize (=ethanol demand) are known from [22]</li><li>➤ For further projection, the CAGR was averaged for the data (EU) from 2023-2030 → +1.35 %</li><li>➤ Projection to 2050 based on the average CAGR on the Europe demand</li></ul>        |

## Formaldehyde

- Global formaldehyde demand is known for 2021 from [23] along with the CAGR (3.39%) for market development based on a forecast until 2035
- The European share of the formaldehyde market is reported to be 14% of the global market in 2020. [24]

## References

- [1] T. Galimova, M. Ram, D. Bogdanov, M. Fasihi, S. Khalili, A. Gulagi, H. Karjunen, T. N. O. Mensah and C. Breyer, Global demand analysis for carbon dioxide as raw material from key industrial sources and direct air capture to produce renewable electricity-based fuels and chemicals, *Journal of Cleaner Production*, 2022, **373**, 133920.
- [2] <https://www.expertmarketresearch.com/reports/europe-cement-market>
- [3] <https://www.iea.org/energy-system/industry/cement>
- [4] <https://civildigital.com/co2-emissions-from-cement-production/>
- [4] <https://www.mordorintelligence.com/industry-reports/europe-flat-glass-market>
- [5] <https://ww3.rics.org/uk/en/modus/natural-environment/renewables/the-75-percent-problem--making-greener-glass.html>
- [6] European Pollutant Release and Transfer Register (EPRTR) – Dataset 2017
- [7] <https://www.cepi.org/wp-content/uploads/2022/07/Key-Statistics-2021-Final.pdf>
- [8] European Pollutant Release and Transfer Register (EPRTR) – Dataset 2017
- [9] <https://op.europa.eu/en/publication-detail/-/publication/0575cc7f-c13a-11e8-9893-01aa75ed71a1/language-en>
- [10] [https://ec.europa.eu/eurostat/databrowser/view/ENV\\_WASMUN\\_custom\\_602405/bookmark/line?lang=en&bookmarkId=3384129b-87fe-4db7-8694-cfb8d1f93c15](https://ec.europa.eu/eurostat/databrowser/view/ENV_WASMUN_custom_602405/bookmark/line?lang=en&bookmarkId=3384129b-87fe-4db7-8694-cfb8d1f93c15)
- [11] <https://population.un.org/wpp/Graphs/Probabilistic/POP/TOT/908>
- [12] <https://www.statista.com/statistics/1315956/waste-reduction-target-scenarios-in-european-union/>

### **Carbon Monoxide:**

- [13] <https://www.fortunebusinessinsights.com/carbon-monoxide-market-105343>
- [14] P. de Luna, C. Hahn, D. Higgins, S. A. Jaffer, T. F. Jaramillo and E. H. Sargent, What would it take for renewably powered electrosynthesis to displace petrochemical processes?, *Science* (New York, N.Y.), 2019, 364. DOI: 10.1126/science.aav3506

### **Formic acid:**

- [15] <https://www.chemanalyst.com/industry-report/formic-acid-market-688>
- [16] <https://www.precedenceresearch.com/formic-acid-market>

### **Ethylene:**

- [17] Ethylene Market Report: Current Industry Trends, Insights, (globenewswire.com)

### **Methanol:**



[18] <https://www.marketresearch.com/ChemAnalyst-v4204/Europe-Methanol-Plant-Capacity-Production-14810176/>

[19] Methanol Price|Methanol Institute|<https://www.methanol.org/methanol-price-supply-demand/>

[20] P. Tian, Y. Wei, M. Ye and Z. Liu, Methanol to Olefins (MTO): From Fundamentals to Commercialization, ACS catalysis, 2015, 5, 1922–1938.

#### **Ethanol:**

[21]: <https://www.marketresearch.com/ChemAnalyst-v4204/Europe-Methanol-Plant-Capacity-Production-14810176/>

[22] <https://www.databridgemarketresearch.com/reports/europe-ethanol-market>

#### **Formaldehyde:**

[23] <https://www.chemanalyst.com/industry-report/formaldehyde-market-627>

[24] <https://www.statista.com/statistics/1323629/distribution-of-formaldehyde-demand-worldwide-by-region/>
